# Supplementary material for: A Randomized, Double-Blind, Placebo-Controlled Phase III Trial On The Efficacy and Safety of Tocilizumab in Patients With Colchicine-Resistant or -Intolerant Familial Mediterranean Fever
Source: Research Square preprint supplement (doi:10.21203/rs.3.rs-1005662/v1), 2021-10-27
Supplement: Supplementary file 1 [file b8c25b7eabcacd2289da08da.docx]

**supplementary Table S2 Accompanying symptoms at 48 weeks (NUH01FMF, NUH02FMF, FAS)**

|  | Placebo (n=11) | Tocilizumab (n= 12) | Total (n=23) |
| --- | --- | --- | --- |
| Accompanying symptoms (/week) |  |  |  |
| any | 0.0901 (0.1836) | 0.1114 (0.1746) | 0.1003 (0.1756) |
| abnominal pain | 0.0350 (0.0710) | 0.0189 (0.0270) | 0.0273 (0.0540) |
| chest pain | 0.0326 (0.0900) | 0.013 (0.0269) | 0.0224 (0.0671) |
| arthritis | 0.0104 (0.0258) | 0.0566 (0.1544) | 0.0325 (0.1083) |
| headache | 0.0069 (0.0240) | 0.0151 (0.0280) | 0.0108 (0.0257) |

(SD)
